# Supplementary material for: A general approach to study molecular fragmentation and energy redistribution after an ionizing event
Source: Royal Society of Chemistry journal article supplement (doi:10.1039/d0cp04890a), 2020-12-14

| H                                                                                 |                                                                                   |
|-----------------------------------------------------------------------------------|-----------------------------------------------------------------------------------|
|  |  |
| 1<br>H.q0.m2-2<br>2-S (SO3)                                                       | 2<br>H.q1.m1-1<br>1-S (SO3)                                                       |

| C                                                                                 |                                                                                   |                                                                                   |                                                                                   |
|-----------------------------------------------------------------------------------|-----------------------------------------------------------------------------------|-----------------------------------------------------------------------------------|-----------------------------------------------------------------------------------|
|  |  |  |  |
| 1<br>C.q0.m1-2<br>1-D (SO3)                                                       | 2<br>C.q0.m3-1<br>3-P (SO3)                                                       | 3<br>C.q1.m2-2<br>2-P (SO3)                                                       | 4<br>C.q1.m4-1<br>4-P (SO3)                                                       |

| O                                                                                 |                                                                                   |                                                                                   |                                                                                   |
|-----------------------------------------------------------------------------------|-----------------------------------------------------------------------------------|-----------------------------------------------------------------------------------|-----------------------------------------------------------------------------------|
|  |  |  |  |
| 1<br>O.q0.m1-2<br>1-D (SO3)                                                       | 2<br>O.q0.m3-1<br>3-P (SO3)                                                       | 3<br>O.q1.m2-2<br>2-D (SO3)                                                       | 4<br>O.q1.m4-1<br>4-S (SO3)                                                       |

| H <sub>2</sub>                                                                      |                                                                                     |
|-------------------------------------------------------------------------------------|-------------------------------------------------------------------------------------|
|  |  |
| 1<br>H2.q0.m1-2<br>1-SGG (D*H)                                                      | 2<br>H2.q1.m2-1<br>2-SGG (D*H)                                                      |

| HC                                                                                  |                                                                                     |                                                                                     |                                                                                     |
|-------------------------------------------------------------------------------------|-------------------------------------------------------------------------------------|-------------------------------------------------------------------------------------|-------------------------------------------------------------------------------------|
|  |  |  |  |
| 1<br>HC.q0.m2-1<br>2-PI (C*V)                                                       | 2<br>HC.q0.m4-24<br>4-SG (C*V)                                                      | 3<br>HC.q1.m1-1<br>1-SG (C*V)                                                       | 4<br>HC.q1.m3-1<br>3-PI (C*V)                                                       |

| HO                                                                                  |                                                                                     |                                                                                     |
|-------------------------------------------------------------------------------------|-------------------------------------------------------------------------------------|-------------------------------------------------------------------------------------|
|  |  |  |
| 1<br>HO.q0.m2-2<br>2-PI (C*V)                                                       | 2<br>HO.q1.m1-1<br>1-SG (C*V)                                                       | 3<br>HO.q1.m3-1<br>3-SG (C*V)                                                       |

| C <sub>2</sub>                                                                    |                                                                                   |                                                                                   |                                                                                   |
|-----------------------------------------------------------------------------------|-----------------------------------------------------------------------------------|-----------------------------------------------------------------------------------|-----------------------------------------------------------------------------------|
|  |  |  |  |
| 1<br>C2.q0.m1-3<br>1-SGG (D*H)                                                    | 2<br>C2.q0.m3-2<br>3-PIU (D*H)                                                    | 3<br>C2.q1.m2-4<br>2-PIU (D*H)                                                    | 4<br>C2.q1.m4-1<br>4-SGG (D*H)                                                    |

| CO                                                                                |                                                                                   |                                                                                   |                                                                                   |
|-----------------------------------------------------------------------------------|-----------------------------------------------------------------------------------|-----------------------------------------------------------------------------------|-----------------------------------------------------------------------------------|
|  |  |  |  |
| 1<br>CO.q0.m1-2<br>1-SG (C*V)                                                     | 2<br>CO.q0.m3-2<br>3-PI (C*V)                                                     | 3<br>CO.q1.m2-3<br>2-SG (C*V)                                                     | 4<br>CO.q1.m4-8<br>4-PI (C*V)                                                     |

| H <sub>2</sub> C                                                                  |                                                                                   |                                                                                   |                                                                                   |                                                                                     |
|-----------------------------------------------------------------------------------|-----------------------------------------------------------------------------------|-----------------------------------------------------------------------------------|-----------------------------------------------------------------------------------|-------------------------------------------------------------------------------------|
|  |  |  |  |  |
| 1<br>H2C.q0.m1-1<br>1-A1 (C2V)                                                    | 2<br>H2C.q0.m3-7<br>3-B1 (C2V)                                                    | 3<br>H2C.q0.m3-9<br>3-A2 (C2V)                                                    | 4<br>H2C.q1.m2-18<br>2-A1 (C2V)                                                   | 5<br>H2C.q1.m4-1<br>4-A2 (C2V)                                                      |

| H <sub>2</sub> O                                                                    |                                                                                     |                                                                                     |
|-------------------------------------------------------------------------------------|-------------------------------------------------------------------------------------|-------------------------------------------------------------------------------------|
|  |  |  |
| 1<br>H2O.q0.m1-2<br>1-A1 (C2V)                                                      | 2<br>H2O.q1.m2-5<br>2-B1 (C2V)                                                      | 3<br>H2O.q1.m2-6<br>2-B1 (C2V)                                                      |

| HC <sub>2</sub>                                                                     |                                                                                     |                                                                                     |                                                                                     |                                                                                       |
|-------------------------------------------------------------------------------------|-------------------------------------------------------------------------------------|-------------------------------------------------------------------------------------|-------------------------------------------------------------------------------------|---------------------------------------------------------------------------------------|
|  |  |  |  |  |
| 1<br>HC2.q0.m2-1<br>2-SG (C*V)                                                      | 2<br>HC2.q0.m2-3<br>2-A1 (C2V)                                                      | 3<br>HC2.q0.m4-1<br>4-A'' (CS)                                                      | 4<br>HC2.q1.m1-2<br>1-A' (CS)                                                       | 5<br>HC2.q1.m3-1<br>3-PI (C*V)                                                        |

| HCO                                                                               |                                                                                   |                                                                                   |                                                                                   |                                                                                     |                                                                                     |
|-----------------------------------------------------------------------------------|-----------------------------------------------------------------------------------|-----------------------------------------------------------------------------------|-----------------------------------------------------------------------------------|-------------------------------------------------------------------------------------|-------------------------------------------------------------------------------------|
|  |  |  |  |  |  |
| 1<br>HCO.q0.m2-2<br>2-A' (CS)                                                     | 2<br>HCO.q0.m2-7<br>2-A' (CS)                                                     | 3<br>HCO.q0.m4-12<br>4-A'' (CS)                                                   | 4<br>HCO.q1.m1-1<br>1-SG (C*V)                                                    | 5<br>HCO.q1.m1-2<br>1-SG (C*V)                                                      | 6<br>HCO.q1.m3-2<br>3-A' (CS)                                                       |
|  |                                                                                   |                                                                                   |                                                                                   |                                                                                     |                                                                                     |
| 7<br>HCO.q1.m3-3<br>3-A' (CS)                                                     |                                                                                   |                                                                                   |                                                                                   |                                                                                     |                                                                                     |

| C <sub>3</sub>                                                                    |                                                                                   |                                                                                   |                                                                                   |                                                                                     |                                                                                     |
|-----------------------------------------------------------------------------------|-----------------------------------------------------------------------------------|-----------------------------------------------------------------------------------|-----------------------------------------------------------------------------------|-------------------------------------------------------------------------------------|-------------------------------------------------------------------------------------|
|  |  |  |  |  |  |
| 1<br>C3.q0.m1-1<br>1-SGG (D*H)                                                    | 2<br>C3.q0.m3-1<br>3-A1' (D3H)                                                    | 3<br>C3.q0.m3-3<br>3-PIG (D*H)                                                    | 4<br>C3.q1.m2-1<br>2-B2 (C2V)                                                     | 5<br>C3.q1.m2-2<br>2-A' (CS)                                                        | 6<br>C3.q1.m4-3<br>4-PIU (D*H)                                                      |
|  |                                                                                   |                                                                                   |                                                                                   |                                                                                     |                                                                                     |
| 7<br>C3.q1.m4-4<br>4-A1' (D3H)                                                    |                                                                                   |                                                                                   |                                                                                   |                                                                                     |                                                                                     |

| C <sub>2</sub> O                                                                    |                                                                                     |                                                                                     |                                                                                     |                                                                                       |
|-------------------------------------------------------------------------------------|-------------------------------------------------------------------------------------|-------------------------------------------------------------------------------------|-------------------------------------------------------------------------------------|---------------------------------------------------------------------------------------|
|  |  |  |  |  |
| 1<br>C2O.q0.m1-2<br>1-SG (C*V)                                                      | 2<br>C2O.q0.m1-3<br>1-A1 (C2V)                                                      | 3<br>C2O.q0.m3-2<br>3-SG (C*V)                                                      | 4<br>C2O.q1.m2-1<br>2-PI (C*V)                                                      | 5<br>C2O.q1.m4-2<br>4-SG (C*V)                                                        |

| H <sub>3</sub> C                                                                    |                                                                                     |                                                                                     |
|-------------------------------------------------------------------------------------|-------------------------------------------------------------------------------------|-------------------------------------------------------------------------------------|
|  |  |  |
| 1<br>H3C.q0.m2-1<br>2-A2'' (D3H)                                                    | 2<br>H3C.q1.m1-1<br>1-A1' (D3H)                                                     | 3<br>H3C.q1.m3-1<br>3-A'' (CS)                                                      |

| H <sub>2</sub> C <sub>2</sub>   |                                 |                                 |                                  |                                 |                                  |
|---------------------------------|---------------------------------|---------------------------------|----------------------------------|---------------------------------|----------------------------------|
|                                 |                                 |                                 |                                  |                                 |                                  |
| 1<br>H2C2.q0.m1-2<br>1-SG (C*V) | 2<br>H2C2.q0.m1-3<br>1-A1 (C2V) | 3<br>H2C2.q0.m3-1<br>3-B2 (C2V) | 4<br>H2C2.q0.m3-2<br>3-AU (C2H)  | 5<br>H2C2.q0.m3-4<br>3-B2 (C2V) | 6<br>H2C2.q1.m2-1<br>2-PIU (D*H) |
|                                 |                                 |                                 |                                  |                                 |                                  |
| 7<br>H2C2.q1.m2-2<br>2-A' (CS)  | 8<br>H2C2.q1.m4-2<br>4-BG (C2H) | 9<br>H2C2.q1.m4-3<br>4-A2 (C2V) | 10<br>H2C2.q1.m4-4<br>4-A2 (C2V) |                                 |                                  |

| H <sub>2</sub> CO               |                                 |                                |                                 |                                |                                 |
|---------------------------------|---------------------------------|--------------------------------|---------------------------------|--------------------------------|---------------------------------|
|                                 |                                 |                                |                                 |                                |                                 |
| 1<br>H2CO.q0.m1-1<br>1-A1 (C2V) | 2<br>H2CO.q0.m1-3<br>1-A1 (C2V) | 3<br>H2CO.q0.m1-4<br>1-A' (CS) | 4<br>H2CO.q0.m3-4<br>3-A'' (CS) | 5<br>H2CO.q1.m2-3<br>2-A' (CS) | 6<br>H2CO.q1.m2-5<br>2-B2 (C2V) |
|                                 |                                 |                                |                                 |                                |                                 |
| 7<br>H2CO.q1.m4-1<br>4-A'' (CS) | 8<br>H2CO.q1.m4-3<br>4-A (C1)   |                                |                                 |                                |                                 |

| HC <sub>3</sub>                |                                |                                 |                                 |                                |                                |
|--------------------------------|--------------------------------|---------------------------------|---------------------------------|--------------------------------|--------------------------------|
|                                |                                |                                 |                                 |                                |                                |
| 1<br>HC3.q0.m2-1<br>2-A' (CS)  | 2<br>HC3.q0.m2-2<br>2-B2 (C2V) | 3<br>HC3.q0.m4-16<br>4-SG (C*V) | 4<br>HC3.q0.m4-18<br>4-A'' (CS) | 5<br>HC3.q1.m1-1<br>1-A1 (C2V) | 6<br>HC3.q1.m1-3<br>1-SG (C*V) |
|                                |                                |                                 |                                 |                                |                                |
| 7<br>HC3.q1.m3-1<br>3-PI (C*V) | 8<br>HC3.q1.m3-2<br>3-B2 (C2V) |                                 |                                 |                                |                                |

| HC <sub>2</sub> O                |                                  |                                  |                                 |                                  |                                  |
|----------------------------------|----------------------------------|----------------------------------|---------------------------------|----------------------------------|----------------------------------|
|                                  |                                  |                                  |                                 |                                  |                                  |
| 1<br>HC2O.q0.m2-2<br>2-A'' (CS)  | 2<br>HC2O.q0.m2-5<br>2-A'' (CS)  | 3<br>HC2O.q0.m4-6<br>4-A'' (CS)  | 4<br>HC2O.q0.m4-8<br>4-A (C1)   | 5<br>HC2O.q0.m4-13<br>4-A'' (CS) | 6<br>HC2O.q0.m4-14<br>4-A'' (CS) |
|                                  |                                  |                                  |                                 |                                  |                                  |
| 7<br>HC2O.q0.m4-16<br>4-A'' (CS) | 8<br>HC2O.q1.m1-1<br>1-A' (CS)   | 9<br>HC2O.q1.m1-2<br>1-A' (CS)   | 10<br>HC2O.q1.m1-3<br>1-A' (CS) | 11<br>HC2O.q1.m1-4<br>1-A (C1)   | 12<br>HC2O.q1.m1-5<br>1-A' (CS)  |
|                                  |                                  |                                  |                                 |                                  |                                  |
| 13<br>HC2O.q1.m3-1<br>3-A'' (CS) | 14<br>HC2O.q1.m3-2<br>3-A'' (CS) | 15<br>HC2O.q1.m3-4<br>3-A'' (CS) |                                 |                                  |                                  |

| C <sub>4</sub>                 |                                |                                |                               |                               |                                |
|--------------------------------|--------------------------------|--------------------------------|-------------------------------|-------------------------------|--------------------------------|
|                                |                                |                                |                               |                               |                                |
| 1<br>C4.q0.m1-1<br>1-SGG (D*H) | 2<br>C4.q0.m1-3<br>1-AG (D2H)  | 3<br>C4.q0.m3-1<br>3-SGG (D*H) | 4<br>C4.q0.m3-2<br>3-B1 (C2V) | 5<br>C4.q0.m3-5<br>3-A1 (D2D) | 6<br>C4.q1.m2-1<br>2-PIG (D*H) |
|                                |                                |                                |                               |                               |                                |
| 7<br>C4.q1.m2-2<br>2-A' (CS)   | 8<br>C4.q1.m4-1<br>4-B3U (D2H) | 9<br>C4.q1.m4-2<br>4-A2 (C2V)  |                               |                               |                                |

| C <sub>3</sub> O              |                                |                                |                               |                                |                                |
|-------------------------------|--------------------------------|--------------------------------|-------------------------------|--------------------------------|--------------------------------|
|                               |                                |                                |                               |                                |                                |
| 1<br>C3O.q0.m1-3<br>1-A' (CS) | 2<br>C3O.q0.m1-4<br>1-SG (C*V) | 3<br>C3O.q0.m1-5<br>1-SG (C*V) | 4<br>C3O.q0.m3-1<br>3-A' (CS) | 5<br>C3O.q1.m2-2<br>2-SG (C*V) | 6<br>C3O.q1.m2-3<br>2-SG (C*V) |
|                               |                                |                                |                               |                                |                                |
| 7<br>C3O.q1.m2-4<br>2-A (C1)  | 8<br>C3O.q1.m4-4<br>4-A2 (C2V) | 9<br>C3O.q1.m4-5<br>4-A (C1)   |                               |                                |                                |

| H <sub>4</sub> C              |                                |
|-------------------------------|--------------------------------|
|                               |                                |
| 1<br>H4C.q0.m1-1<br>1-A1 (TD) | 2<br>H4C.q1.m2-1<br>2-B2 (D2D) |

| H <sub>3</sub> C <sub>2</sub>   |                                 |                                 |                                 |                                 |                                 |
|---------------------------------|---------------------------------|---------------------------------|---------------------------------|---------------------------------|---------------------------------|
|                                 |                                 |                                 |                                 |                                 |                                 |
| 1<br>H3C2.q0.m2-1<br>2-A' (CS)  | 2<br>H3C2.q0.m2-2<br>2-A' (CS)  | 3<br>H3C2.q0.m4-8<br>4-A1 (C3V) | 4<br>H3C2.q0.m4-9<br>4-A'' (CS) | 5<br>H3C2.q1.m1-1<br>1-A1 (C3V) | 6<br>H3C2.q1.m1-2<br>1-A1 (C2V) |
|                                 |                                 |                                 |                                 |                                 |                                 |
| 7<br>H3C2.q1.m3-2<br>3-A'' (CS) | 8<br>H3C2.q1.m3-3<br>3-A'' (CS) |                                 |                                 |                                 |                                 |

| H <sub>3</sub> CO              |                               |                                |                                 |                                 |
|--------------------------------|-------------------------------|--------------------------------|---------------------------------|---------------------------------|
|                                |                               |                                |                                 |                                 |
| 1<br>H3CO.q0.m2-1<br>2-A' (CS) | 2<br>H3CO.q0.m2-2<br>2-A (C1) | 3<br>H3CO.q1.m1-3<br>1-A' (CS) | 4<br>H3CO.q1.m3-2<br>3-A'' (CS) | 5<br>H3CO.q1.m3-8<br>3-A'' (CS) |

| H <sub>2</sub> C <sub>3</sub>   |                                  |                                  |                                 |                                  |                                  |
|---------------------------------|----------------------------------|----------------------------------|---------------------------------|----------------------------------|----------------------------------|
|                                 |                                  |                                  |                                 |                                  |                                  |
| 1<br>H2C3.q0.m1-2<br>1-A1 (C2V) | 2<br>H2C3.q0.m1-3<br>1-AG (C2H)  | 3<br>H2C3.q0.m1-4<br>1-A1 (C2V)  | 4<br>H2C3.q0.m1-5<br>1-A (C2)   | 5<br>H2C3.q0.m3-2<br>3-A'' (CS)  | 6<br>H2C3.q0.m3-3<br>3-A'' (CS)  |
|                                 |                                  |                                  |                                 |                                  |                                  |
| 7<br>H2C3.q0.m3-4<br>3-B2 (C2V) | 8<br>H2C3.q0.m3-5<br>3-A (C1)    | 9<br>H2C3.q1.m2-1<br>2-PIG (D*H) | 10<br>H2C3.q1.m2-2<br>2-A' (CS) | 11<br>H2C3.q1.m2-3<br>2-A1 (C2V) | 12<br>H2C3.q1.m4-1<br>4-A2 (C2V) |
|                                 |                                  |                                  |                                 |                                  |                                  |
| 13<br>H2C3.q1.m4-2<br>4-A (C1)  | 14<br>H2C3.q1.m4-4<br>4-A2 (C2V) | 15<br>H2C3.q1.m4-5<br>4-A'' (CS) |                                 |                                  |                                  |

| H <sub>2</sub> C <sub>2</sub> O |  |  |  |  |  |
|---------------------------------|--|--|--|--|--|
|                                 |  |  |  |  |  |
|                                 |  |  |  |  |  |

| HC <sub>4</sub> |  |  |  |  |  |
|-----------------|--|--|--|--|--|
|                 |  |  |  |  |  |
|                 |  |  |  |  |  |
|                 |  |  |  |  |  |

| HC <sub>3</sub> O |  |  |  |  |  |
|-------------------|--|--|--|--|--|
|                   |  |  |  |  |  |
|                   |  |  |  |  |  |

| C <sub>4</sub> O                                                                  |                                                                                   |                                                                                   |                                                                                   |                                                                                     |                                                                                     |
|-----------------------------------------------------------------------------------|-----------------------------------------------------------------------------------|-----------------------------------------------------------------------------------|-----------------------------------------------------------------------------------|-------------------------------------------------------------------------------------|-------------------------------------------------------------------------------------|
|  |  |  |  |  |  |
| 1<br>C4O.q0.m1-2<br>1-A' (CS)                                                     | 2<br>C4O.q0.m1-3<br>1-A1 (C2V)                                                    | 3<br>C4O.q0.m1-4<br>1-A' (CS)                                                     | 4<br>C4O.q0.m1-5<br>1-A1 (C2V)                                                    | 5<br>C4O.q0.m3-2<br>3-SG (C*V)                                                      | 6<br>C4O.q1.m2-1<br>2-A' (CS)                                                       |

| H <sub>4</sub> C <sub>2</sub>                                                     |                                                                                   |                                                                                   |                                                                                   |                                                                                     |                                                                                     |
|-----------------------------------------------------------------------------------|-----------------------------------------------------------------------------------|-----------------------------------------------------------------------------------|-----------------------------------------------------------------------------------|-------------------------------------------------------------------------------------|-------------------------------------------------------------------------------------|
|  |  |  |  |  |  |
| 1<br>H4C2.q0.m1-3<br>1-A (C1)                                                     | 2<br>H4C2.q0.m1-4<br>1-AG (D2H)                                                   | 3<br>H4C2.q0.m3-4<br>3-A'' (CS)                                                   | 4<br>H4C2.q0.m3-5<br>3-A1 (D2D)                                                   | 5<br>H4C2.q1.m2-1<br>2-A' (CS)                                                      | 6<br>H4C2.q1.m2-6<br>2-B3 (D2)                                                      |
|  |                                                                                   |                                                                                   |                                                                                   |                                                                                     |                                                                                     |
| 7<br>H4C2.q1.m4-1<br>4-A (C1)                                                     |                                                                                   |                                                                                   |                                                                                   |                                                                                     |                                                                                     |

| H <sub>4</sub> CO                                                                  |                                                                                    |
|------------------------------------------------------------------------------------|------------------------------------------------------------------------------------|
|  |  |
| 1<br>H4CO.q0.m1-6<br>1-A' (CS)                                                     | 2<br>H4CO.q1.m2-3<br>2-A'' (CS)                                                    |

| H <sub>3</sub> C <sub>3</sub>                                                       |                                                                                     |                                                                                     |                                                                                     |                                                                                       |                                                                                       |
|-------------------------------------------------------------------------------------|-------------------------------------------------------------------------------------|-------------------------------------------------------------------------------------|-------------------------------------------------------------------------------------|---------------------------------------------------------------------------------------|---------------------------------------------------------------------------------------|
|  |  |  |  |  |  |
| 1<br>H3C3.q0.m2-1<br>2-B1 (C2V)                                                     | 2<br>H3C3.q0.m2-2<br>2-A' (CS)                                                      | 3<br>H3C3.q0.m2-3<br>2-A'' (CS)                                                     | 4<br>H3C3.q0.m4-1<br>4-A (C1)                                                       | 5<br>H3C3.q0.m4-2<br>4-A'' (CS)                                                       | 6<br>H3C3.q1.m1-1<br>1-A1' (D3H)                                                      |
|  |  |  |  |  |                                                                                       |
| 7<br>H3C3.q1.m1-3<br>1-A' (CS)                                                      | 8<br>H3C3.q1.m1-9<br>1-A' (CS)                                                      | 9<br>H3C3.q1.m3-1<br>3-A'' (CS)                                                     | 10<br>H3C3.q1.m3-2<br>3-A (C1)                                                      | 11<br>H3C3.q1.m3-3<br>3-A' (CS)                                                       |                                                                                       |



| $\text{H}_3\text{C}_2\text{O}$  |                                 |                                  |                                  |                                 |                                 |
|---------------------------------|---------------------------------|----------------------------------|----------------------------------|---------------------------------|---------------------------------|
|                                 |                                 |                                  |                                  |                                 |                                 |
| 1<br>H3C2O.q0.m2-1<br>2-A (C1)  | 2<br>H3C2O.q0.m4-3<br>4-A (C1)  | 3<br>H3C2O.q0.m4-4<br>4-A (C1)   | 4<br>H3C2O.q1.m1-1<br>1-A1 (C3V) | 5<br>H3C2O.q1.m1-2<br>1-A' (CS) | 6<br>H3C2O.q1.m1-4<br>1-A' (CS) |
|                                 |                                 |                                  |                                  |                                 |                                 |
| 7<br>H3C2O.q1.m1-5<br>1-A' (CS) | 8<br>H3C2O.q1.m1-6<br>1-A' (CS) | 9<br>H3C2O.q1.m3-2<br>3-A'' (CS) |                                  |                                 |                                 |

| $\text{H}_2\text{C}_4$           |                                   |                                  |                                  |                                  |                                 |
|----------------------------------|-----------------------------------|----------------------------------|----------------------------------|----------------------------------|---------------------------------|
|                                  |                                   |                                  |                                  |                                  |                                 |
| 1<br>H2C4.q0.m1-1<br>1-SG (C*V)  | 2<br>H2C4.q0.m1-2<br>1-A' (CS)    | 3<br>H2C4.q0.m1-4<br>1-A (C2)    | 4<br>H2C4.q0.m1-5<br>1-A1 (C2V)  | 5<br>H2C4.q0.m1-7<br>1-A1 (C2V)  | 6<br>H2C4.q0.m1-8<br>1-A1 (C2V) |
|                                  |                                   |                                  |                                  |                                  |                                 |
| 7<br>H2C4.q0.m1-9<br>1-AG (C2H)  | 8<br>H2C4.q0.m3-2<br>3-A2 (C2V)   | 9<br>H2C4.q0.m3-3<br>3-AU (C1)   | 10<br>H2C4.q0.m3-4<br>3-A (C1)   | 11<br>H2C4.q0.m3-5<br>3-A (C1)   | 12<br>H2C4.q0.m3-7<br>3-A (C1)  |
|                                  |                                   |                                  |                                  |                                  |                                 |
| 13<br>H2C4.q0.m3-9<br>3-A2 (C2V) | 14<br>H2C4.q0.m3-10<br>3-A2 (C2V) | 15<br>H2C4.q0.m3-11<br>3-A (C1)  | 16<br>H2C4.q1.m2-2<br>2-A2 (C2V) | 17<br>H2C4.q1.m2-3<br>2-B1 (C2V) | 18<br>H2C4.q1.m2-4<br>2-A (C1)  |
|                                  |                                   |                                  |                                  |                                  |                                 |
| 19<br>H2C4.q1.m2-7<br>2-A'' (CS) | 20<br>H2C4.q1.m2-9<br>2-AG (C2H)  | 21<br>H2C4.q1.m4-1<br>4-A'' (CS) | 22<br>H2C4.q1.m4-2<br>4-B1 (C2V) | 23<br>H2C4.q1.m4-4<br>4-A2 (C2V) | 24<br>H2C4.q1.m4-5<br>4-A (C1)  |
|                                  |                                   |                                  |                                  |                                  |                                 |
| 25<br>H2C4.q1.m4-6<br>4-A (C1)   | 26<br>H2C4.q1.m4-7<br>4-A'' (CS)  | 27<br>H2C4.q1.m4-8<br>4-A (C1)   | 28<br>H2C4.q1.m4-9<br>4-A2 (C2V) |                                  |                                 |

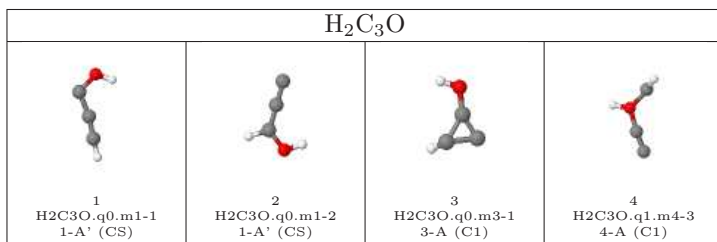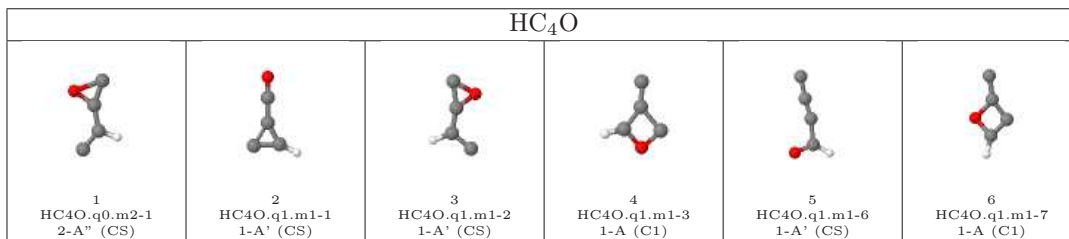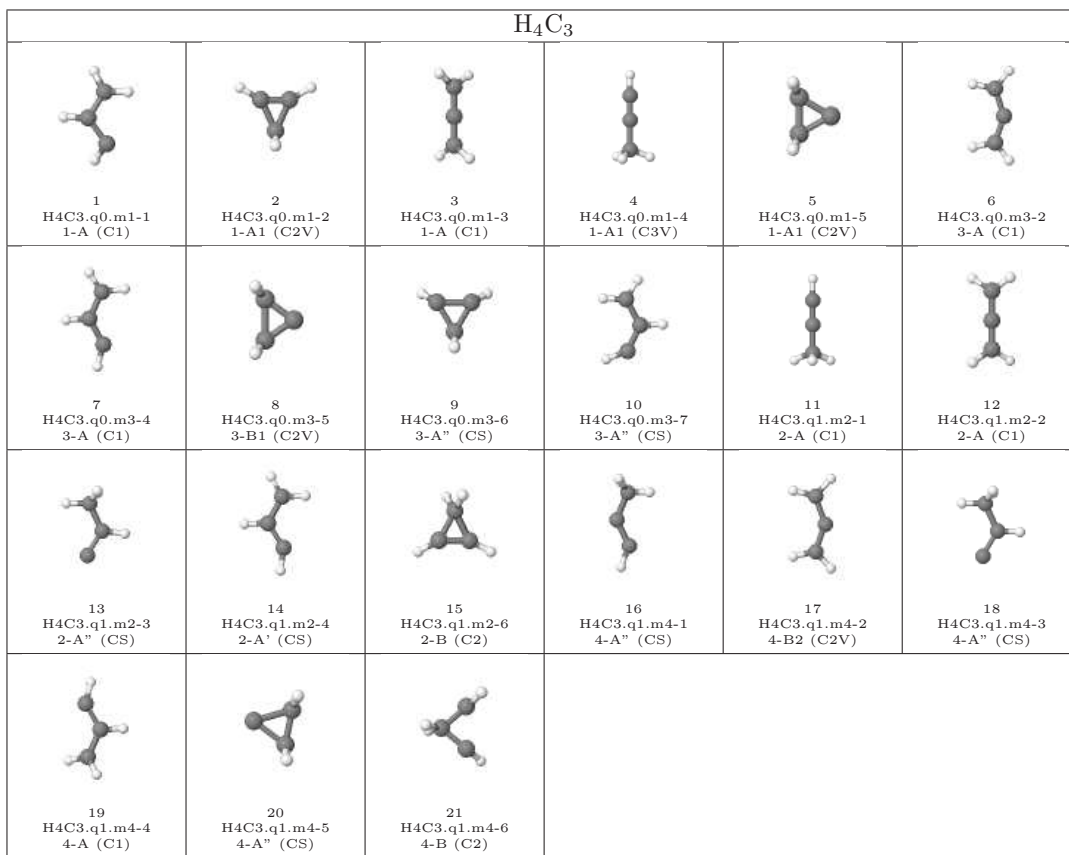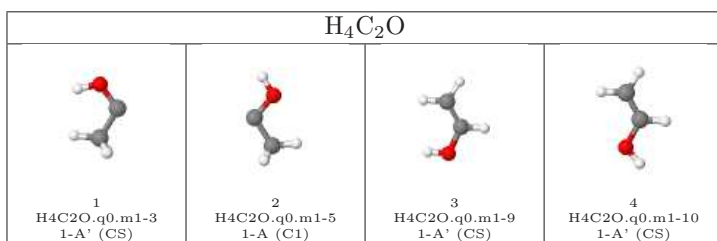

| $H_3C_4$                                                                            |                                                                                     |                                                                                     |                                                                                     |                                                                                       |                                                                                       |
|-------------------------------------------------------------------------------------|-------------------------------------------------------------------------------------|-------------------------------------------------------------------------------------|-------------------------------------------------------------------------------------|---------------------------------------------------------------------------------------|---------------------------------------------------------------------------------------|
|    |    |    |    |    |    |
| 1<br>$H_3C_4.q0.m2-2$<br>2-B2 (C2V)                                                 | 2<br>$H_3C_4.q0.m2-3$<br>2-A (C1)                                                   | 3<br>$H_3C_4.q0.m2-4$<br>2-A' (CS)                                                  | 4<br>$H_3C_4.q0.m2-5$<br>2-A' (CS)                                                  | 5<br>$H_3C_4.q0.m2-7$<br>2-A (C1)                                                     | 6<br>$H_3C_4.q0.m2-8$<br>2-A (C1)                                                     |
|    |    |    |    |    |    |
| 7<br>$H_3C_4.q0.m2-10$<br>2-A (C1)                                                  | 8<br>$H_3C_4.q0.m2-12$<br>2-A'' (CS)                                                | 9<br>$H_3C_4.q0.m2-13$<br>2-A'' (CS)                                                | 10<br>$H_3C_4.q0.m2-14$<br>2-A (C1)                                                 | 11<br>$H_3C_4.q0.m4-1$<br>4-A1 (C3V)                                                  | 12<br>$H_3C_4.q0.m4-2$<br>4-A'' (CS)                                                  |
|    |    |    |    |    |    |
| 13<br>$H_3C_4.q0.m4-3$<br>4-A'' (CS)                                                | 14<br>$H_3C_4.q0.m4-4$<br>4-A'' (CS)                                                | 15<br>$H_3C_4.q0.m4-5$<br>4-A (C1)                                                  | 16<br>$H_3C_4.q0.m4-6$<br>4-A (C1)                                                  | 17<br>$H_3C_4.q0.m4-7$<br>4-A'' (CS)                                                  | 18<br>$H_3C_4.q0.m4-8$<br>4-A'' (CS)                                                  |
|    |    |    |    |    |    |
| 19<br>$H_3C_4.q0.m4-9$<br>4-A (C1)                                                  | 20<br>$H_3C_4.q0.m4-10$<br>4-A (C1)                                                 | 21<br>$H_3C_4.q0.m4-12$<br>4-B2 (C2V)                                               | 22<br>$H_3C_4.q0.m4-13$<br>4-A' (CS)                                                | 23<br>$H_3C_4.q0.m4-14$<br>4-A'' (CS)                                                 | 24<br>$H_3C_4.q0.m1-1$<br>1-A1 (C3V)                                                  |
|  |  |  |  |  |  |
| 25<br>$H_3C_4.q1.m1-2$<br>1-A1 (C2V)                                                | 26<br>$H_3C_4.q1.m1-3$<br>1-A (C1)                                                  | 27<br>$H_3C_4.q1.m1-5$<br>1-A' (CS)                                                 | 28<br>$H_3C_4.q1.m1-7$<br>1-A (C1)                                                  | 29<br>$H_3C_4.q1.m1-10$<br>1-A' (CS)                                                  | 30<br>$H_3C_4.q1.m1-11$<br>1-A (C1)                                                   |
|  |  |  |  |  |  |
| 31<br>$H_3C_4.q1.m1-13$<br>1-A1 (C2V)                                               | 32<br>$H_3C_4.q1.m1-15$<br>1-A (C1)                                                 | 33<br>$H_3C_4.q1.m3-1$<br>3-A'' (CS)                                                | 34<br>$H_3C_4.q1.m3-2$<br>3-A2 (C2V)                                                | 35<br>$H_3C_4.q1.m3-3$<br>3-A'' (CS)                                                  | 36<br>$H_3C_4.q1.m3-4$<br>3-A'' (CS)                                                  |
|  |  |  |  |  |  |
| 37<br>$H_3C_4.q1.m3-5$<br>3-A'' (CS)                                                | 38<br>$H_3C_4.q1.m3-7$<br>3-A'' (CS)                                                | 39<br>$H_3C_4.q1.m3-8$<br>3-A (C1)                                                  | 40<br>$H_3C_4.q1.m3-10$<br>3-A (C1)                                                 | 41<br>$H_3C_4.q1.m3-11$<br>3-A (C1)                                                   | 42<br>$H_3C_4.q1.m3-12$<br>3-A'' (CS)                                                 |
|  |  |  |                                                                                     |                                                                                       |                                                                                       |
| 43<br>$H_3C_4.q1.m3-13$<br>3-A'' (CS)                                               | 44<br>$H_3C_4.q1.m3-14$<br>3-A (C1)                                                 | 45<br>$H_3C_4.q1.m3-15$<br>3-A' (CS)                                                |                                                                                     |                                                                                       |                                                                                       |

| H <sub>2</sub> C <sub>4</sub> O                                                                                                               |                                                                                                                                               |                                                                                                                                               |                                                                                                                                                 |                                                                                                                                                |                                                                                                                                                 |
|-----------------------------------------------------------------------------------------------------------------------------------------------|-----------------------------------------------------------------------------------------------------------------------------------------------|-----------------------------------------------------------------------------------------------------------------------------------------------|-------------------------------------------------------------------------------------------------------------------------------------------------|------------------------------------------------------------------------------------------------------------------------------------------------|-------------------------------------------------------------------------------------------------------------------------------------------------|
| <br>1<br>H <sub>2</sub> C <sub>4</sub> O.q0.m1-1<br>1-A (C1) | <br>2<br>H <sub>2</sub> C <sub>4</sub> O.q0.m1-2<br>1-A (C1) | <br>3<br>H <sub>2</sub> C <sub>4</sub> O.q1.m2-1<br>2-A (C1) | <br>4<br>H <sub>2</sub> C <sub>4</sub> O.q1.m2-2<br>2-A'' (CS) | <br>5<br>H <sub>2</sub> C <sub>4</sub> O.q1.m2-4<br>2-A (C1) | <br>6<br>H <sub>2</sub> C <sub>4</sub> O.q1.m2-5<br>2-A (C1) |
| <br>7<br>H <sub>2</sub> C <sub>4</sub> O.q1.m2-6<br>2-A (C1) | <br>8<br>H <sub>2</sub> C <sub>4</sub> O.q1.m4-1<br>4-A (C1) |                                                                                                                                               |                                                                                                                                                 |                                                                                                                                                |                                                                                                                                                 |

| $H_4C_4$                                                                            |                                                                                     |                                                                                     |                                                                                     |                                                                                       |                                                                                       |
|-------------------------------------------------------------------------------------|-------------------------------------------------------------------------------------|-------------------------------------------------------------------------------------|-------------------------------------------------------------------------------------|---------------------------------------------------------------------------------------|---------------------------------------------------------------------------------------|
|    |    |    |    |    |    |
| 1<br>$H_4C_4.q0.m1-1$<br>1-A' (CS)                                                  | 2<br>$H_4C_4.q0.m1-2$<br>1-A (C1)                                                   | 3<br>$H_4C_4.q0.m1-3$<br>1-A (C1)                                                   | 4<br>$H_4C_4.q0.m1-4$<br>1-A1 (C2V)                                                 | 5<br>$H_4C_4.q0.m1-5$<br>1-A (C1)                                                     | 6<br>$H_4C_4.q0.m1-6$<br>1-A' (CS)                                                    |
|    |    |    |    |    |    |
| 7<br>$H_4C_4.q0.m1-7$<br>1-A' (CS)                                                  | 8<br>$H_4C_4.q0.m1-11$<br>1-A (C1)                                                  | 9<br>$H_4C_4.q0.m1-12$<br>1-A' (CS)                                                 | 10<br>$H_4C_4.q0.m1-13$<br>1-AG (D2H)                                               | 11<br>$H_4C_4.q0.m1-14$<br>1-A (C1)                                                   | 12<br>$H_4C_4.q0.m1-15$<br>1-A' (CS)                                                  |
|    |    |    |    |    |    |
| 13<br>$H_4C_4.q0.m1-17$<br>1-A' (CS)                                                | 14<br>$H_4C_4.q0.m1-18$<br>1-A1 (TD)                                                | 15<br>$H_4C_4.q0.m1-19$<br>1-AG (D2H)                                               | 16<br>$H_4C_4.q0.m3-1$<br>3-A'' (CS)                                                | 17<br>$H_4C_4.q0.m3-3$<br>3-A (C1)                                                    | 18<br>$H_4C_4.q0.m3-4$<br>3-A (C1)                                                    |
|    |    |    |    |    |    |
| 19<br>$H_4C_4.q0.m3-5$<br>3-A (C1)                                                  | 20<br>$H_4C_4.q0.m3-6$<br>3-A'' (CS)                                                | 21<br>$H_4C_4.q0.m3-7$<br>3-BU (C2H)                                                | 22<br>$H_4C_4.q0.m3-8$<br>3-A (C1)                                                  | 23<br>$H_4C_4.q0.m3-9$<br>3-A (C1)                                                    | 24<br>$H_4C_4.q0.m3-10$<br>3-A (C1)                                                   |
|  |  |  |  |  |  |
| 25<br>$H_4C_4.q0.m3-12$<br>3-A (C1)                                                 | 26<br>$H_4C_4.q0.m3-13$<br>3-AG (C1)                                                | 27<br>$H_4C_4.q0.m3-14$<br>3-A'' (CS)                                               | 28<br>$H_4C_4.q0.m3-15$<br>3-A2 (C2V)                                               | 29<br>$H_4C_4.q0.m3-16$<br>3-B2 (C2V)                                                 | 30<br>$H_4C_4.q0.m3-17$<br>3-A (C1)                                                   |
|  |  |  |  |  |  |
| 31<br>$H_4C_4.q0.m3-18$<br>3-A'' (CS)                                               | 32<br>$H_4C_4.q0.m3-19$<br>3-A1 (D2D)                                               | 33<br>$H_4C_4.q1.m2-1$<br>2-A (C1)                                                  | 34<br>$H_4C_4.q1.m2-2$<br>2-A'' (CS)                                                | 35<br>$H_4C_4.q1.m2-3$<br>2-A (C1)                                                    | 36<br>$H_4C_4.q1.m2-4$<br>2-B1 (C2V)                                                  |
|  |  |  |  |  |  |
| 37<br>$H_4C_4.q1.m2-5$<br>2-A (C1)                                                  | 38<br>$H_4C_4.q1.m2-6$<br>2-A'' (CS)                                                | 39<br>$H_4C_4.q1.m2-7$<br>2-A (C1)                                                  | 40<br>$H_4C_4.q1.m2-8$<br>2-A' (CS)                                                 | 41<br>$H_4C_4.q1.m2-9$<br>2-A (C1)                                                    | 42<br>$H_4C_4.q1.m2-10$<br>2-A (C1)                                                   |
|  |  |  |  |  |  |
| 43<br>$H_4C_4.q1.m2-11$<br>2-A (C1)                                                 | 44<br>$H_4C_4.q1.m2-12$<br>2-A'' (CS)                                               | 45<br>$H_4C_4.q1.m2-13$<br>2-B2G (D2H)                                              | 46<br>$H_4C_4.q1.m2-14$<br>2-A (C1)                                                 | 47<br>$H_4C_4.q1.m2-15$<br>2-A' (CS)                                                  | 48<br>$H_4C_4.q1.m2-17$<br>2-BU (C2H)                                                 |

| $H_4C_4$ (Continued from previous page)                                           |                                                                                   |                                                                                   |                                                                                   |                                                                                     |                                                                                     |
|-----------------------------------------------------------------------------------|-----------------------------------------------------------------------------------|-----------------------------------------------------------------------------------|-----------------------------------------------------------------------------------|-------------------------------------------------------------------------------------|-------------------------------------------------------------------------------------|
|  |  |  |  |  |  |
| 49<br>H4C4.q1.m2-18<br>2-A1 (D2D)                                                 | 50<br>H4C4.q1.m2-19<br>2-B2 (D2)                                                  | 51<br>H4C4.q1.m4-1<br>4-A (C1)                                                    | 52<br>H4C4.q1.m4-2<br>4-A (C1)                                                    | 53<br>H4C4.q1.m4-3<br>4-A (C1)                                                      | 54<br>H4C4.q1.m4-4<br>4-A (C1)                                                      |
|  |  |  |  |  |  |
| 55<br>H4C4.q1.m4-5<br>4-A" (CS)                                                   | 56<br>H4C4.q1.m4-6<br>4-A (C1)                                                    | 57<br>H4C4.q1.m4-7<br>4-AU (C2H)                                                  | 58<br>H4C4.q1.m4-8<br>4-A (C1)                                                    | 59<br>H4C4.q1.m4-9<br>4-A" (CS)                                                     | 60<br>H4C4.q1.m4-10<br>4-A (C1)                                                     |
|  |  |  |  |   |  |
| 61<br>H4C4.q1.m4-11<br>4-A (C1)                                                   | 62<br>H4C4.q1.m4-12<br>4-A" (CS)                                                  | 63<br>H4C4.q1.m4-13<br>4-AU (C2H)                                                 | 64<br>H4C4.q1.m4-14<br>4-A (C1)                                                   | 65<br>H4C4.q1.m4-15<br>4-B2 (C2V)                                                   | 66<br>H4C4.q1.m4-16<br>4-A2 (C2V)                                                   |
|  |  |  |                                                                                   |                                                                                     |                                                                                     |
| 67<br>H4C4.q1.m4-17<br>4-B1 (C2V)                                                 | 68<br>H4C4.q1.m4-18<br>4-A (C1)                                                   | 69<br>H4C4.q1.m4-19<br>4-B3 (D2)                                                  |                                                                                   |                                                                                     |                                                                                     |

| $H_4C_3O$                                                                           |                                                                                     |                                                                                     |                                                                                     |                                                                                       |                                                                                       |
|-------------------------------------------------------------------------------------|-------------------------------------------------------------------------------------|-------------------------------------------------------------------------------------|-------------------------------------------------------------------------------------|---------------------------------------------------------------------------------------|---------------------------------------------------------------------------------------|
|  |  |  |  |  |  |
| 1<br>H4C3O.q0.m1-2<br>1-A (C1)                                                      | 2<br>H4C3O.q0.m1-3<br>1-A (C1)                                                      | 3<br>H4C3O.q0.m1-4<br>1-A (C1)                                                      | 4<br>H4C3O.q0.m3-2<br>3-A (C1)                                                      | 5<br>H4C3O.q1.m2-2<br>2-A (C1)                                                        | 6<br>H4C3O.q1.m2-4<br>2-A" (CS)                                                       |
|  |  |  |                                                                                     |                                                                                       |                                                                                       |
| 7<br>H4C3O.q1.m4-1<br>4-A (C1)                                                      | 8<br>H4C3O.q1.m4-2<br>4-A (C1)                                                      | 9<br>H4C3O.q1.m4-3<br>4-A (C1)                                                      |                                                                                     |                                                                                       |                                                                                       |

| H <sub>3</sub> C <sub>4</sub> O                                                                                      |                                                                                                                     |                                                                                                                     |                                                                                                                     |                                                                                                                       |                                                                                                                       |
|----------------------------------------------------------------------------------------------------------------------|---------------------------------------------------------------------------------------------------------------------|---------------------------------------------------------------------------------------------------------------------|---------------------------------------------------------------------------------------------------------------------|-----------------------------------------------------------------------------------------------------------------------|-----------------------------------------------------------------------------------------------------------------------|
| <br>1<br>H3C4O.q0.m2-1<br>2-A" (CS) | <br>2<br>H3C4O.q0.m2-2<br>2-A (C1) | <br>3<br>H3C4O.q1.m1-1<br>1-A (C1) | <br>4<br>H3C4O.q1.m1-2<br>1-A (C1) | <br>5<br>H3C4O.q1.m1-3<br>1-A (C1) | <br>6<br>H3C4O.q1.m1-4<br>1-A (C1) |
| <br>7<br>H3C4O.q1.m1-5<br>1-A (C1)  |                                                                                                                     |                                                                                                                     |                                                                                                                     |                                                                                                                       |                                                                                                                       |

| C <sub>4</sub> H <sub>4</sub> O                             |                                                             |                                                             |                                                             |                                                             |                                                             |
|-------------------------------------------------------------|-------------------------------------------------------------|-------------------------------------------------------------|-------------------------------------------------------------|-------------------------------------------------------------|-------------------------------------------------------------|
|                                                             |                                                             |                                                             |                                                             |                                                             |                                                             |
| 1<br>C <sub>4</sub> H <sub>4</sub> O.q0.m1-1<br>1-A' (CS)   | 2<br>C <sub>4</sub> H <sub>4</sub> O.q0.m1-2<br>1-A1 (C2V)  | 3<br>C <sub>4</sub> H <sub>4</sub> O.q0.m1-3<br>1-A' (CS)   | 4<br>C <sub>4</sub> H <sub>4</sub> O.q0.m1-4<br>1-A1 (C2V)  | 5<br>C <sub>4</sub> H <sub>4</sub> O.q0.m1-5<br>1-A' (CS)   | 6<br>C <sub>4</sub> H <sub>4</sub> O.q0.m1-6<br>1-A' (CS)   |
|                                                             |                                                             |                                                             |                                                             |                                                             |                                                             |
| 7<br>C <sub>4</sub> H <sub>4</sub> O.q0.m1-7<br>1-A' (C1)   | 8<br>C <sub>4</sub> H <sub>4</sub> O.q0.m1-8<br>1-A' (CS)   | 9<br>C <sub>4</sub> H <sub>4</sub> O.q0.m1-9<br>1-A' (CS)   | 10<br>C <sub>4</sub> H <sub>4</sub> O.q0.m1-10<br>1-A' (CS) | 11<br>C <sub>4</sub> H <sub>4</sub> O.q0.m1-11<br>1-A' (CS) | 12<br>C <sub>4</sub> H <sub>4</sub> O.q0.m1-12<br>1-A' (CS) |
|                                                             |                                                             |                                                             |                                                             |                                                             |                                                             |
| 13<br>C <sub>4</sub> H <sub>4</sub> O.q0.m1-13<br>1-A' (CS) | 14<br>C <sub>4</sub> H <sub>4</sub> O.q0.m1-14<br>1-A' (CS) | 15<br>C <sub>4</sub> H <sub>4</sub> O.q0.m1-15<br>1-A' (C1) | 16<br>C <sub>4</sub> H <sub>4</sub> O.q0.m1-16<br>1-A' (C1) | 17<br>C <sub>4</sub> H <sub>4</sub> O.q0.m1-17<br>1-A' (CS) | 18<br>C <sub>4</sub> H <sub>4</sub> O.q0.m1-18<br>1-A' (CS) |
|                                                             |                                                             |                                                             |                                                             |                                                             |                                                             |
| 19<br>C <sub>4</sub> H <sub>4</sub> O.q0.m1-19<br>1-A' (CS) | 20<br>C <sub>4</sub> H <sub>4</sub> O.q0.m1-20<br>1-A' (CS) | 21<br>C <sub>4</sub> H <sub>4</sub> O.q0.m1-21<br>1-A' (CS) | 22<br>C <sub>4</sub> H <sub>4</sub> O.q1.m2-1<br>2-A' (CS)  | 23<br>C <sub>4</sub> H <sub>4</sub> O.q1.m2-2<br>2-A' (C1)  | 24<br>C <sub>4</sub> H <sub>4</sub> O.q1.m2-3<br>2-A2 (C2V) |
|                                                             |                                                             |                                                             |                                                             |                                                             |                                                             |
| 25<br>C <sub>4</sub> H <sub>4</sub> O.q1.m2-4<br>2-A' (CS)  | 26<br>C <sub>4</sub> H <sub>4</sub> O.q1.m2-5<br>2-A'' (CS) | 27<br>C <sub>4</sub> H <sub>4</sub> O.q1.m2-6<br>2-A' (C1)  | 28<br>C <sub>4</sub> H <sub>4</sub> O.q1.m2-7<br>2-A' (CS)  | 29<br>C <sub>4</sub> H <sub>4</sub> O.q1.m2-8<br>2-A'' (CS) | 30<br>C <sub>4</sub> H <sub>4</sub> O.q1.m2-9<br>2-A'' (CS) |
|                                                             |                                                             |                                                             |                                                             |                                                             |                                                             |
| 31<br>C <sub>4</sub> H <sub>4</sub> O.q1.m2-10<br>2-A' (CS) | 32<br>C <sub>4</sub> H <sub>4</sub> O.q1.m2-11<br>2-A' (C1) | 33<br>C <sub>4</sub> H <sub>4</sub> O.q1.m2-12<br>2-A' (C1) | 34<br>C <sub>4</sub> H <sub>4</sub> O.q1.m2-13<br>2-A' (C1) | 35<br>C <sub>4</sub> H <sub>4</sub> O.q1.m2-14<br>2-A' (CS) | 36<br>C <sub>4</sub> H <sub>4</sub> O.q1.m2-15<br>2-A' (C1) |
|                                                             |                                                             |                                                             |                                                             |                                                             |                                                             |
| 37<br>C <sub>4</sub> H <sub>4</sub> O.q1.m2-16<br>2-A' (C1) | 38<br>C <sub>4</sub> H <sub>4</sub> O.q1.m2-19<br>2-A' (CS) | 39<br>C <sub>4</sub> H <sub>4</sub> O.q1.m2-20<br>2-A' (C1) |                                                             |                                                             |                                                             |



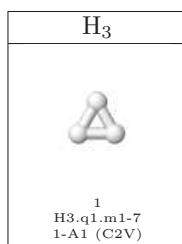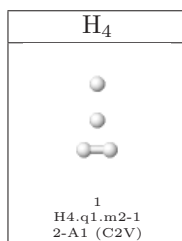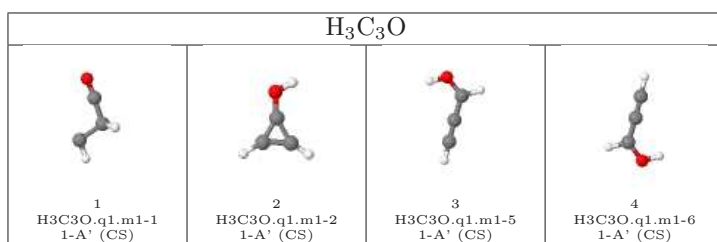

Supplement: d0cp04890a1.zip [file d0cp04890a1.zip]
