# Supplementary figures and images for: A general approach to study molecular fragmentation and energy redistribution after an ionizing event
Source: Royal Society of Chemistry journal article supplement (doi:10.1039/d0cp04890a), 2020-12-14

Probability [%]

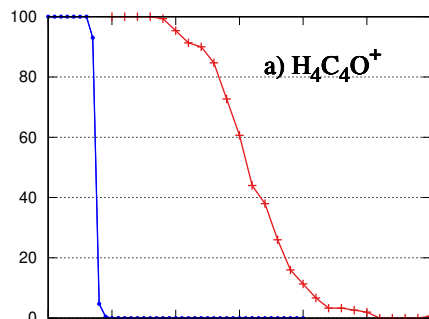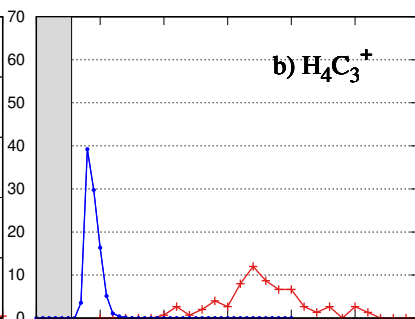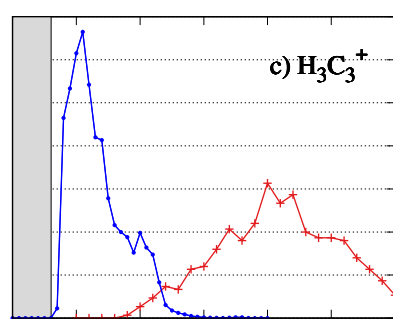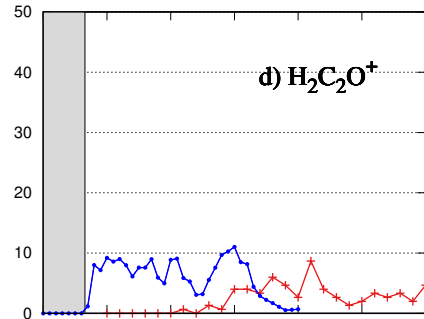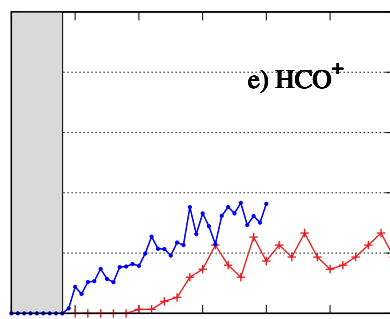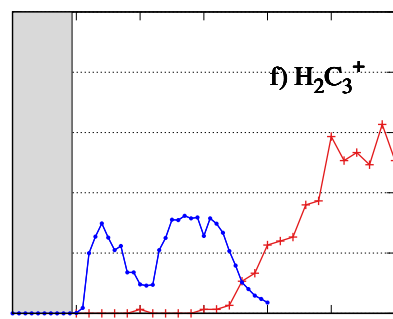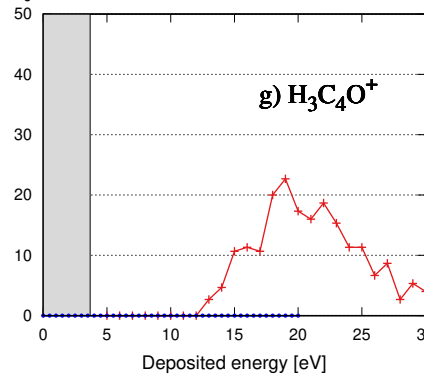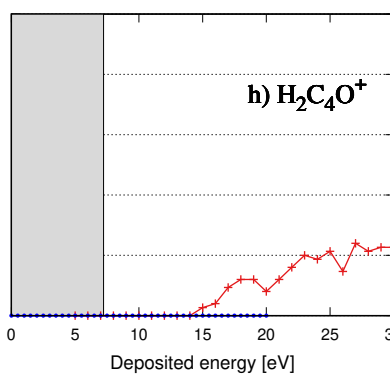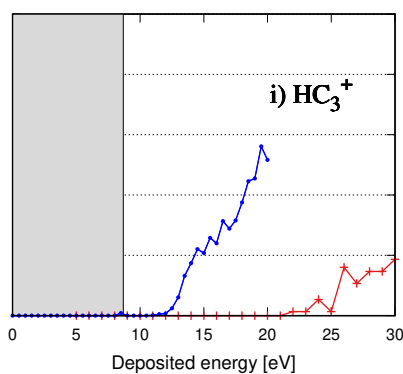

Supplement: d0cp04890a1.zip [file d0cp04890a1.zip]

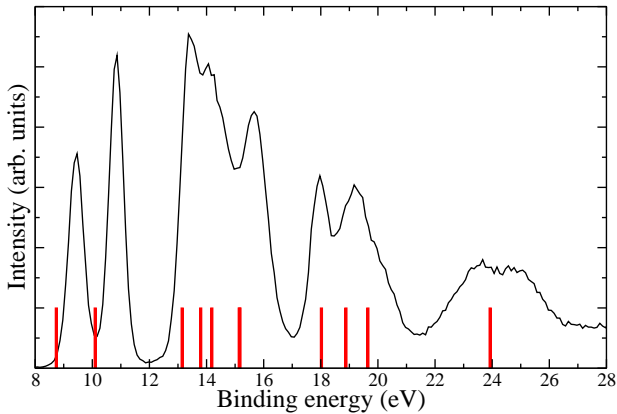

Supplement: d0cp04890a1.zip [file d0cp04890a1.zip]

Probability [%]

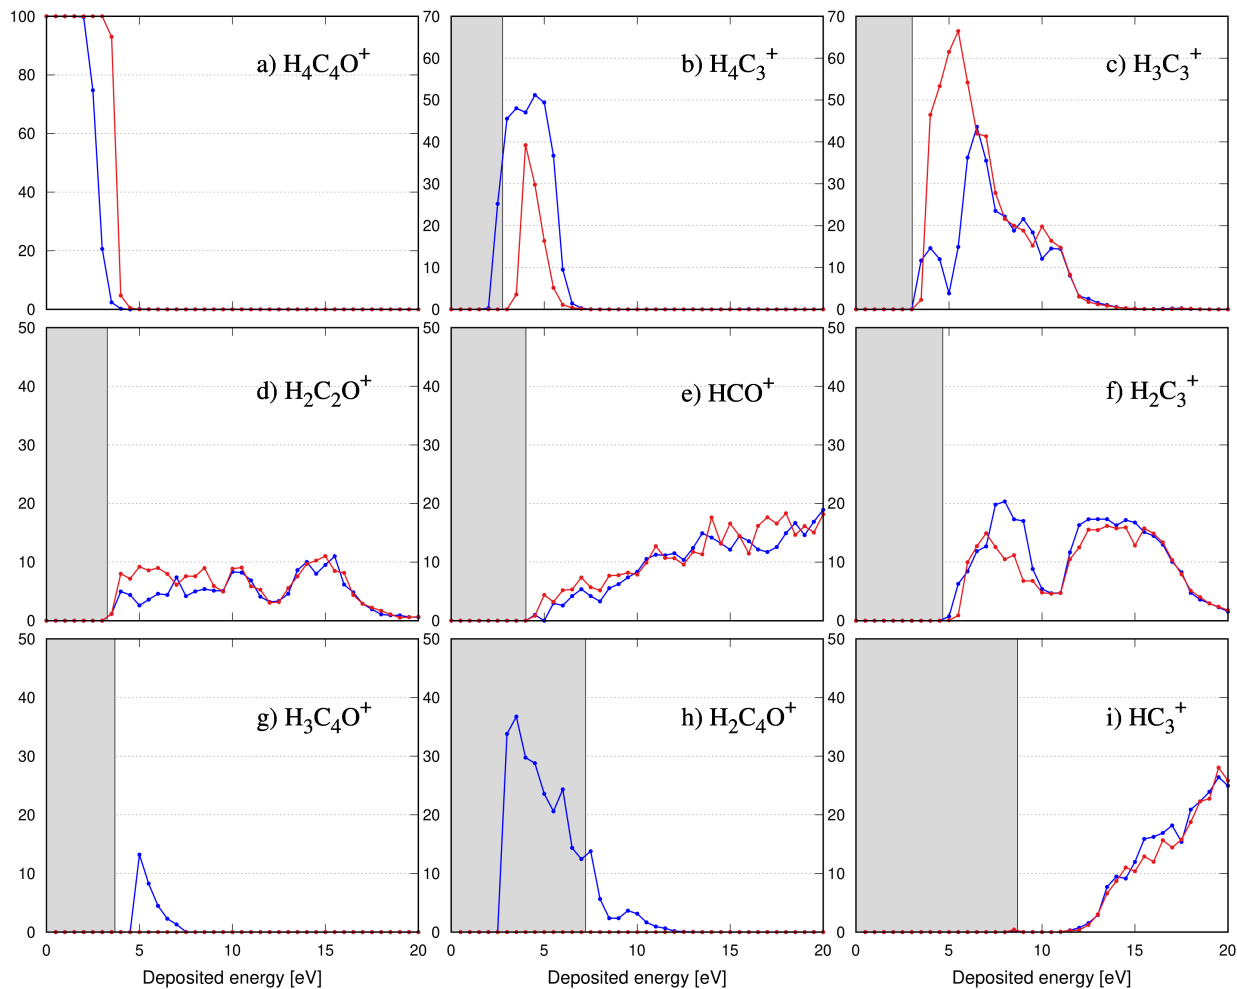

$M_3C$  —●—  $M_3C$  with energy barriers —●—

Supplement: d0cp04890a1.zip [file d0cp04890a1.zip]
